# Supplementary material for: Equilibrium and NMR studies on GdIII, YIII, CuIIand ZnIIcomplexes of various DTPA–N,N″-bis(amide) ligands. Kinetic stabilities of the gadolinium(iii) complexes
Source: Royal Society of Chemistry journal article supplement (doi:10.1039/b514173g), 2005-11-24
Supplement: b514173g.pdf [file b514173g.pdf]

Supplementary Information for

Equilibrium and NMR spectroscopic studies on the gadolinium(III), yttrium(III), copper(II) and zinc(II) complexes formed with the DTPA-N,N,N',N''-bis(amide), -bis(n-butylamide) and -bis[bis(n-butylamide)] ligands. Kinetic stabilities of the gadolinium(III) complexes

Zoltán Jászberényi<sup>[a]</sup>, István Bányai<sup>[b]</sup>, Ernő Brücher<sup>[a]</sup>, Róbert Király<sup>[a]</sup>, Kálmán Hideg<sup>[c]</sup>, Tamás Kálai<sup>[c]</sup>

<sup>[a]</sup>*University of Debrecen, Department of Inorganic and Analytical Chemistry, H-4010 Debrecen, Hungary*

<sup>[b]</sup>*University of Debrecen, Department of Physical Chemistry, H-4010 Debrecen, Hungary*

<sup>[c]</sup>*University of Pécs, Institute of Organic and Medicinal Chemistry, H-7602 Pécs, Hungary*

- Figure S1** pH dependence of the relaxivities of the Gd<sup>3+</sup> complexes [(1) GdL<sup>2</sup>, (2) GdL<sup>1</sup>, (3) GdL<sup>0</sup>, 25 °C, [GdL] = 1 × 10<sup>-3</sup> M, 9 MHz]
- Figure S2** <sup>1</sup>H (upper) and <sup>13</sup>C NMR spectra of YL<sup>0</sup> complex. The bottom left spectrum shows the CO region while the CH<sub>2</sub> peaks are shown in the bottom right spectrum. T= 323 K, pH = 5.8 and c= 0.05 M in D<sub>2</sub>O solution.
- Figure S3.** <sup>13</sup>C 2D EXSY NMR spectrum of YL<sup>0</sup> complex. The carbonyl region is shown. T= 323 K, pH = 5.8 and c= 0.05 M in D<sub>2</sub>O solution.
- Figure S4** Pseudo-first-order rate constants of the exchange reactions between GdL<sup>1</sup> (5 × 10<sup>-4</sup> M) and Zn<sup>2+</sup>. [Zn<sup>2+</sup>] = 0.03 M (1), 0.02 M (2), 0.015 M (3) and 0.01 M (4) (25 °C, 1.0 M KCl)
- Figure S5.** Pseudo-first-order rate constants of exchange reactions between GdL<sup>0</sup> (5 × 10<sup>-4</sup> M) and Zn<sup>2+</sup>. [Zn<sup>2+</sup>] = 0.03 M (1), 0.02 M (2), 0.015 M (3) and 0.01 M (4) (25 °C, 1.0 M KCl)
- Figure S6.** Pseudo-first-order rate constants of exchange reactions between GdL<sup>1</sup> (2 × 10<sup>-4</sup> M) and Cu<sup>2+</sup>. [Cu<sup>2+</sup>] = 6 × 10<sup>-3</sup> M (1), 4 × 10<sup>-3</sup> M (2), 2 × 10<sup>-3</sup> M (3) and 1 × 10<sup>-3</sup> M (4) (25 °C, 1.0 M KCl)
- Figure S7.** Pseudo-first-order rate constants of exchange reactions between GdL<sup>2</sup> (5 × 10<sup>-4</sup> M) and Zn<sup>2+</sup>. [Zn<sup>2+</sup>] = 0.03 M (1), 0.02 M (2), 0.015 M (3) and 0.01 M (4) (25 °C 1.0 M KCl)
- Figure S8.** Pseudo-first-order rate constants of exchange reactions between GdL<sup>2</sup> (2 × 10<sup>-4</sup> M) and Cu<sup>2+</sup>. [Cu<sup>2+</sup>] = 6 × 10<sup>-3</sup> M (1), 4 × 10<sup>-3</sup> M (2), 2 × 10<sup>-3</sup> M (3) and 1 × 10<sup>-3</sup> M (4) (25 °C, 1.0 M KCl)

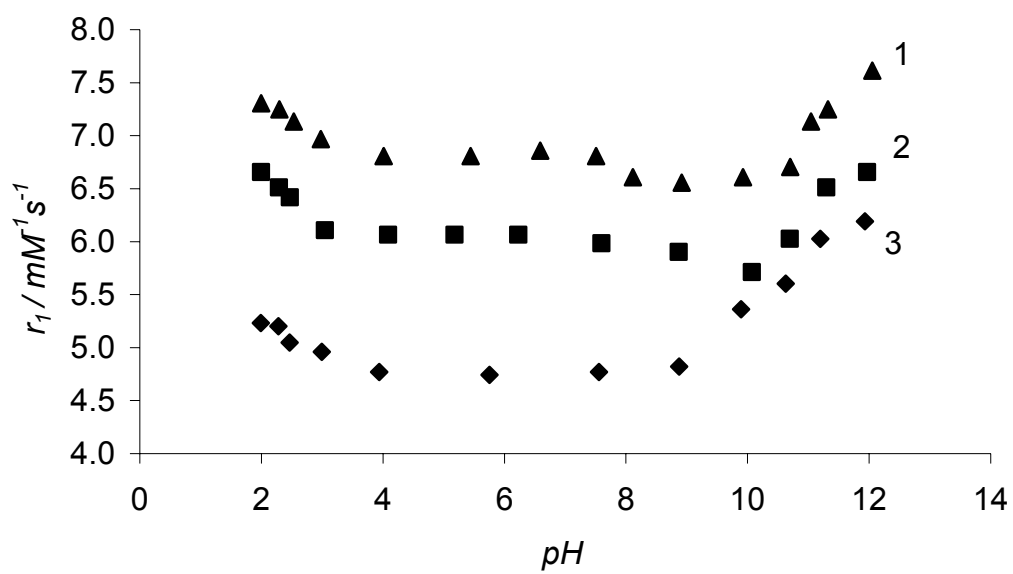

**Figure S1** pH dependence of the relaxivities of the Gd<sup>3+</sup> complexes [(1) GdL<sup>2</sup>, (2) GdL<sup>1</sup>, (3) GdL<sup>0</sup>, 25°C, [GdL] = 1×10<sup>-3</sup> M, 9 MHz]

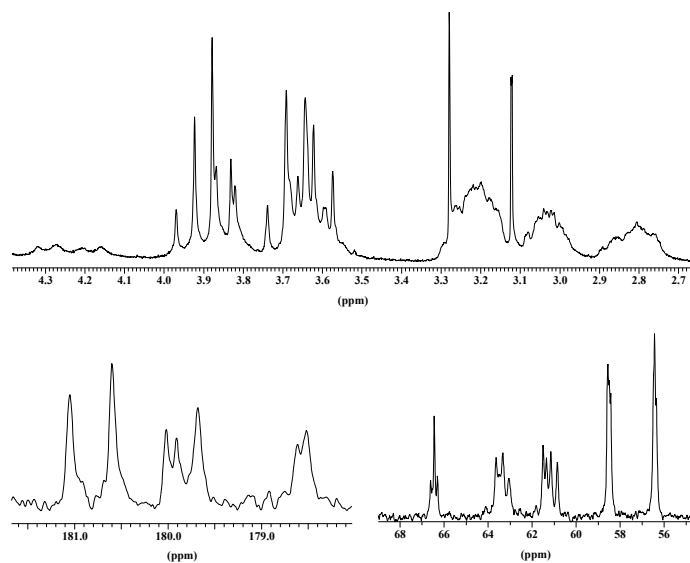

**Figure S2** <sup>1</sup>H (upper) and <sup>13</sup>C NMR spectra of YL<sup>0</sup> complex. The bottom left spectrum shows the CO region while the CH<sub>2</sub> peaks are shown in the bottom right spectrum. T= 323 K, pH = 5.8 and c= 0.05 M in D<sub>2</sub>O solution.

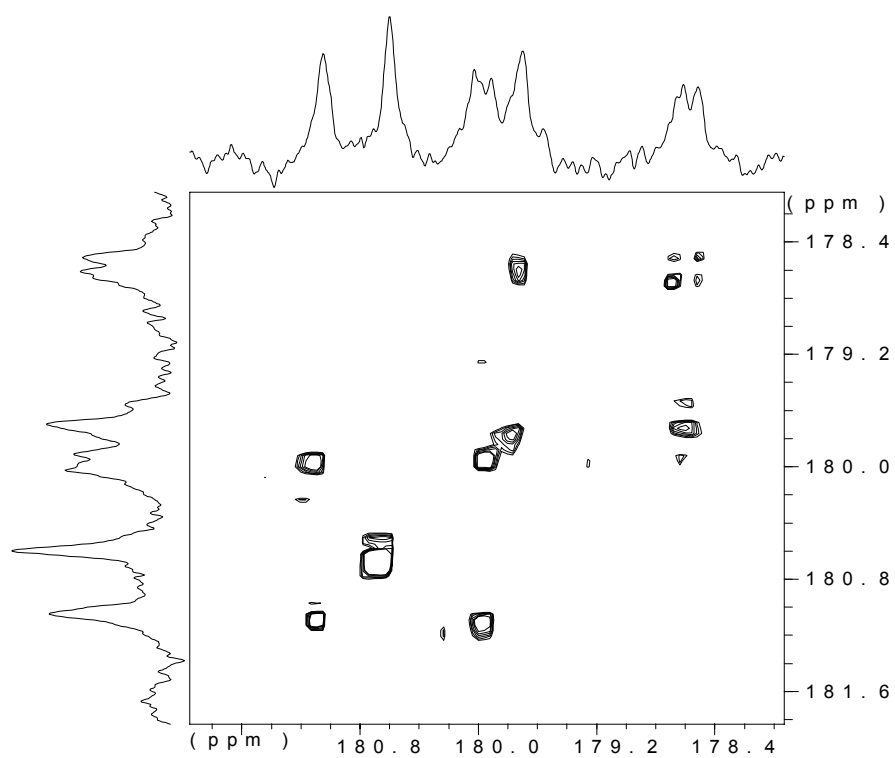

**Figure S3.** <sup>13</sup>C 2D EXSY NMR spectrum of YL<sup>0</sup> complex. The carbonyl region is shown. T= 323 K, pH = 5.8 and c= 0.05 M in D<sub>2</sub>O solution.

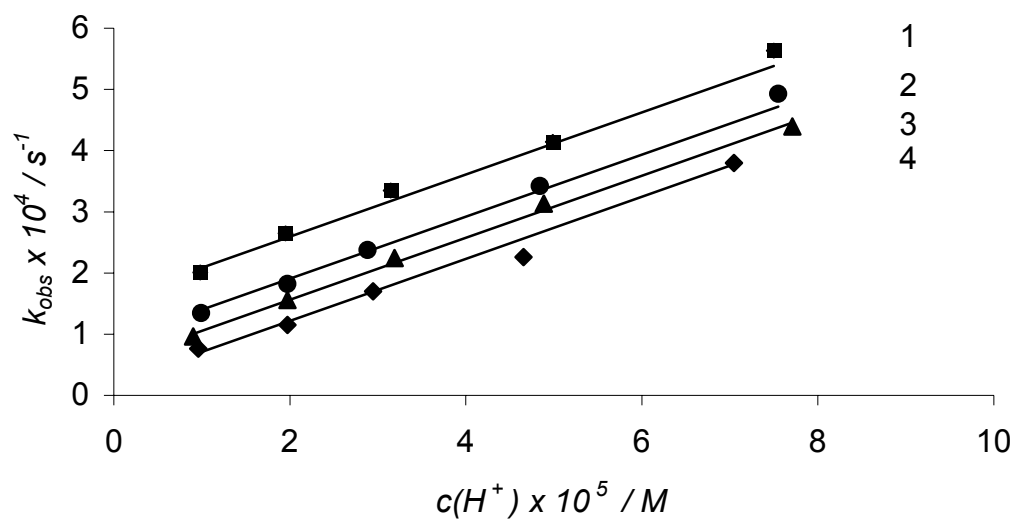

**Figure S4** Pseudo-first-order rate constants of the exchange reactions between GdL<sup>1</sup> ( $5 \times 10^{-4}$  M) and Zn<sup>2+</sup>. [Zn<sup>2+</sup>] = 0.03 M (1), 0.02 M (2), 0.015 M (3) and 0.01 M (4) (25 °C, 1.0 M KCl)

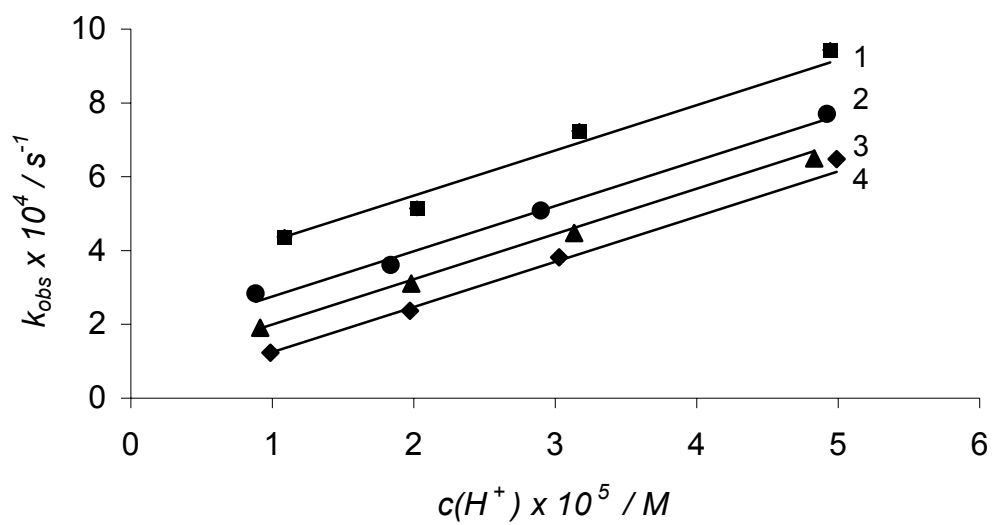

**Figure S5.** Pseudo-first-order rate constants of exchange reactions between  $GdL^0$  ( $5 \times 10^{-4}$  M) and  $Zn^{2+}$ .  $[Zn^{2+}] = 0.03$  M (1), 0.02 M (2), 0.015 M (3) and 0.01 M (4) (25 °C, 1.0 M KCl)

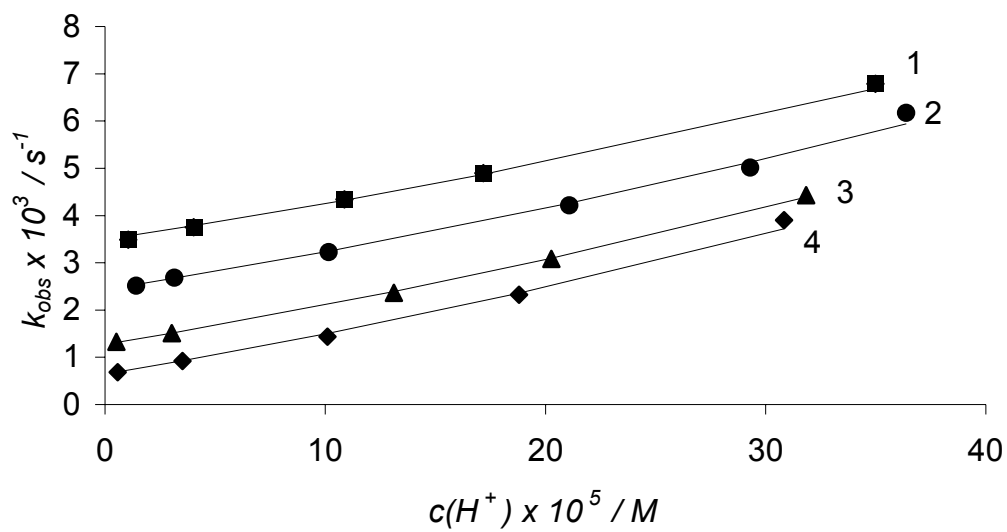

**Figure S6.** Pseudo-first-order rate constants of exchange reactions between GdL<sup>1</sup> ( $2 \times 10^{-4}$  M) and Cu<sup>2+</sup>. [Cu<sup>2+</sup>] =  $6 \times 10^{-3}$  M (1),  $4 \times 10^{-3}$  M (2),  $2 \times 10^{-3}$  M (3) and  $1 \times 10^{-3}$  M (4) (25 °C, 1.0 M KCl)

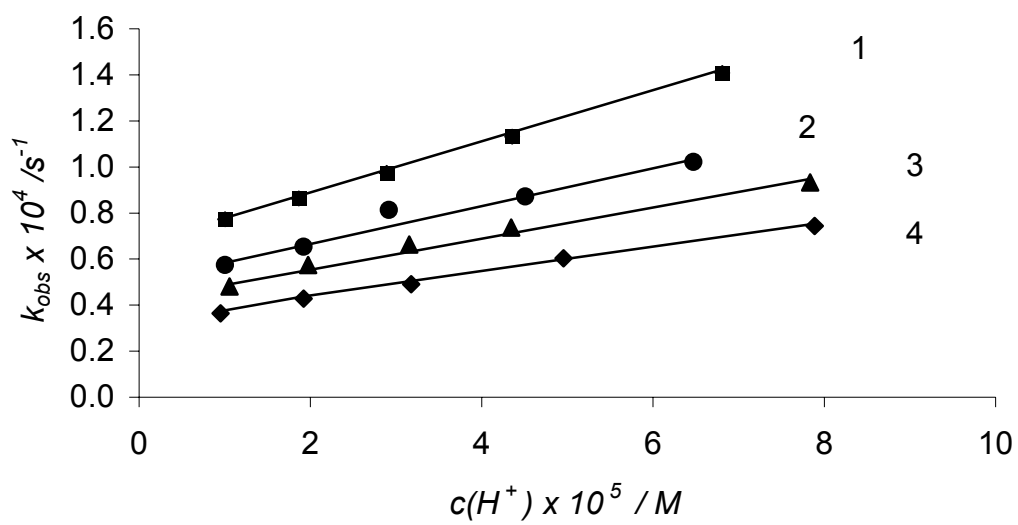

**Figure S7.** Pseudo-first-order rate constants of exchange reactions between  $GdL^2$  ( $5 \times 10^{-4}$  M) and  $Zn^{2+}$ .  $[Zn^{2+}] = 0.03$  M (1), 0.02 M (2), 0.015 M (3) and 0.01 M (4) (25 °C 1.0 M KCl)



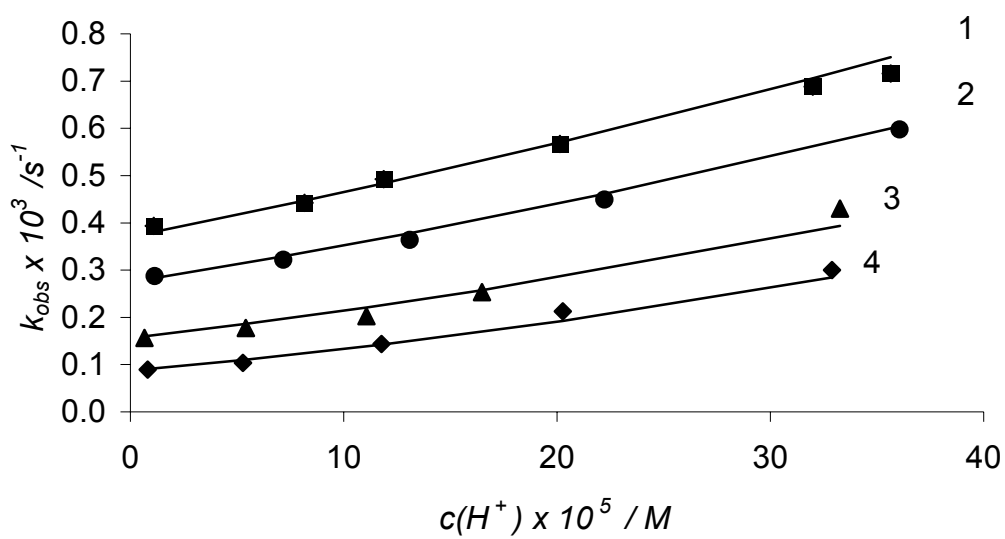

**Figure S8.** Pseudo-first-order rate constants of exchange reactions between  $GdL^2$  ( $2 \times 10^{-4}$  M) and  $Cu^{2+}$ .  $[Cu^{2+}] = 6 \times 10^{-3}$  M (1),  $4 \times 10^{-3}$  M (2),  $2 \times 10^{-3}$  M (3) and  $1 \times 10^{-3}$  M (4) (25 °C, 1.0 M KCl)
